# Supplementary material for: External Validation of the Modified 4C Deterioration Model and 4C Mortality Score for COVID-19 Patients in a Swiss Tertiary Hospital
Source: MDPI journal article supplement (doi:10.3390/diagnostics12051129), 2022-05-03

# External validation of the modified 4C Deterioration Model and 4C Mortality Score for COVID-19 patients in a Swiss tertiary hospital

Adriana Wirth<sup>1,\*</sup>, Andrea Goetschi<sup>2</sup>, Ulrike Held<sup>2</sup>, Ataman Sendoel<sup>3</sup>, Melina Stuessi-Helbling<sup>1,¶</sup> and Lars C. Huber<sup>1,¶</sup>

## Affiliations

<sup>1</sup> Clinic for Internal Medicine, Department of Internal Medicine, City Hospital Zurich, Triemli, 8063 Zurich, Switzerland

<sup>2</sup> Department of Biostatistics, Epidemiology, Biostatistics and Prevention Institute, University of Zurich, 8001 Zurich, Switzerland

<sup>3</sup> Institute for Regenerative Medicine, University of Zurich, 8952 Schlieren, Switzerland

\* Corresponding author, E-mail: [adriana.wirth@stadtspital.ch](mailto:adriana.wirth@stadtspital.ch)

¶ MSH and LH share Senior Authorship

## Supplementary Materials

**Table S1.** 4C Mortality Score for in-hospital mortality in patients with COVID-19 by Knight et al.

| Variable                                     | 4C Mortality Score |
|----------------------------------------------|--------------------|
| Age (years)                                  |                    |
| <50                                          | -                  |
| 50-59                                        | +2                 |
| 60-69                                        | +4                 |
| 70-79                                        | +6                 |
| ≥80                                          | +7                 |
| Sex at birth                                 |                    |
| Female                                       | -                  |
| Male                                         | +1                 |
| Number of comorbidities                      |                    |
| 0                                            | -                  |
| 1                                            | +1                 |
| ≥2                                           | +2                 |
| Respiratory rate (breaths/min)               |                    |
| <20                                          | -                  |
| 20-29                                        | +1                 |
| ≥30                                          | +2                 |
| Peripheral oxygen saturation on room air (%) |                    |
| ≥92                                          | -                  |
| <92                                          | +2                 |
| Glasgow coma scale score                     |                    |
| 15                                           | -                  |
| <15                                          | +2                 |
| Urea (mmol/l)                                |                    |
| <7                                           | -                  |
| 7-14                                         | +1                 |
| >14                                          | +3                 |
| C reactive protein (mg/l)                    |                    |
| <50                                          | -                  |
| 50-99                                        | +1                 |
| ≥100                                         | +2                 |

**Table S2.** Model parameters for 4C Deterioration Model adopted from Gupta et al.

| Characteristic                       | log(OR) |
|--------------------------------------|---------|
| Intercept                            | 4.033   |
| Age (years)                          | 0.0159  |
| Age (Spline 1)                       | -0.0129 |
| Age (Spline 2)                       | 0.1265  |
| Sex Male                             | 0.2690  |
| Nosocomial<br>Yes                    | 0.2439  |
| Radiographic infiltrates<br>Yes      | 0.3252  |
| Respiratory rate (breaths/min)       | -0.0145 |
| Respiratory rate (Spline 1)          | 0.5992  |
| Respiratory rate (Spline 2)          | -1.0780 |
| SpO <sub>2</sub> (%)                 | -0.0707 |
| SpO <sub>2</sub> (Spline 1)          | -0.0248 |
| SpO <sub>2</sub> (Spline 2)          | 1.0240  |
| Room air or oxygen<br>Oxygen therapy | 0.7450  |
| Glasgow coma scale score<br><15      | 0.6028  |
| CRP (mg/L)                           | 0.0097  |
| CRP (Spline 1)                       | -0.0395 |
| CRP (Spline 2)                       | 0.0588  |
| Lymphocytes (10 <sup>9</sup> /L)     | -0.4564 |
| Lymphocytes (Spline 1)               | 0.7309  |
| Lymphocytes (Spline 2)               | -0.8113 |

**Figure S1.** Predicted versus observed probability of in-hospital deterioration for the original 4C Deterioration Model

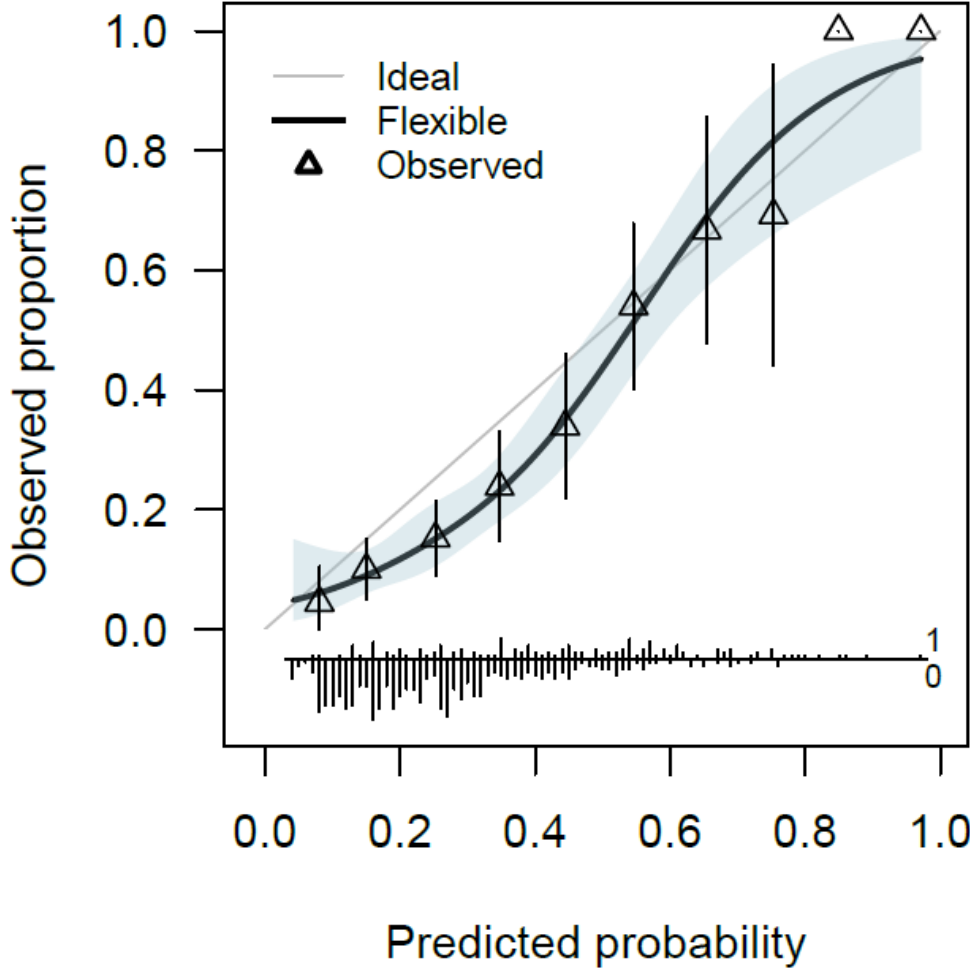

**Table S3.** Model performance before and after model updating in SARS-CoV-2 patients admitted to Triemli Hospital after model recalibration.

|                          | Imputed by MICE        |       |              |                          |                        |
|--------------------------|------------------------|-------|--------------|--------------------------|------------------------|
|                          | AUC                    | Brier | Brier scaled | Calibration-in-the-large | Calibration slope      |
| 4C Deterioration         | 0.781 (0.731 to 0.825) | 0.145 | 0.213        | 0.000 (-0.211 to 0.211)  | 1.298 (1.017 to 1.578) |
| 4C Detrioration+log(NLR) | 0.783 (0.733 to 0.826) | 0.145 | 0.214        | 0.000 (-0.214 to 0.214)  | 1.201 (0.939 to 1.464) |
| 4C Mortality             | 0.846 (0.793 to 0.888) | 0.078 | 0.170        | 0.000 (-0.294 to 0.294)  | 1.521 (1.100 to 1.943) |
| 4C Mortality+log(NLR)    | 0.844 (0.791 to 0.886) | 0.077 | 0.178        | 0.000 (-0.298 to 0.298)  | 1.370 (0.990 to 1.750) |
|                          | Complete case          |       |              |                          |                        |
|                          | AUC                    | Brier | Brier scaled | Calibration-in-the-large | Calibration slope      |
| 4C Deterioration         | 0.786 (0.736 to 0.837) | 0.139 | 0.204        | 0.000 (-0.233 to 0.233)  | 1.372 (1.049 to 1.694) |
| 4C Detrioration+log(NLR) | 0.790 (0.741 to 0.838) | 0.139 | 0.203        | 0.000 (-0.237 to 0.237)  | 1.209 (0.923 to 1.495) |
| 4C Mortality             | 0.835 (0.779 to 0.890) | 0.073 | 0.152        | 0.000 (-0.329 to 0.329)  | 1.467 (1.009 to 1.925) |
| 4C Mortality+log(NLR)    | 0.848 (0.797 to 0.899) | 0.071 | 0.171        | 0.000 (-0.339 to 0.339)  | 1.200 (0.846 to 1.555) |

Note: MICE = Multiple imputation by chained equations, NLR = neutrophil-to-lymphocyte ratio, Reference values for Brier Scores: Brier max 4C Mortality Score: MICE: 0.093 CC: 0.086 Brier max 4C Deterioration model: MICE: 0.184 CC: 0.175

**Table S4.** Model parameters for 4C Mortality Score adopted from Knight et al.

| Characteristic                   | log(OR) |
|----------------------------------|---------|
| Intercept                        | -4.203  |
| Age (years)                      |         |
| 50-59                            | 0.687   |
| 60-69                            | 1.337   |
| 70-79                            | 1.842   |
| ≥80                              | 2.252   |
| Sex Male                         | 0.172   |
| Number of comorbidities          |         |
| 1                                | 0.300   |
| ≥2                               | 0.532   |
| Respiratory rate (breaths/min)   |         |
| 20-29                            | 0.232   |
| ≥30                              | 0.649   |
| SpO <sub>2</sub> on room air (%) |         |
| <92                              | 0.577   |
| Glasgow coma scale score         |         |
| <15                              | 0.558   |
| CRP (mg/L)                       |         |
| 50-99                            | 0.363   |
| ≥100                             | 0.740   |

**Figure S2.** Predicted versus observed probability of in-hospital mortality for the original 4C Mortality Score

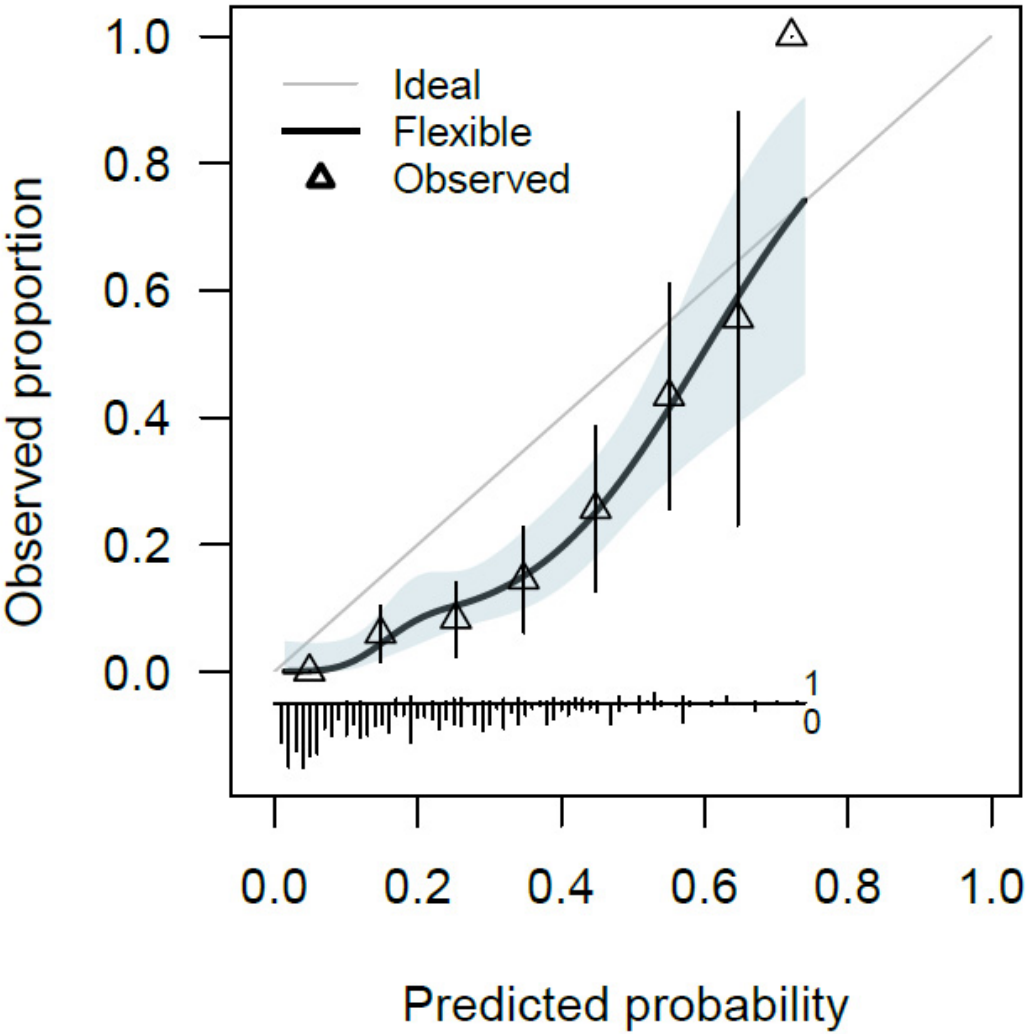

Supplement: s1 [file s1]
